# Supplementary material for: The wheat WRKY transcription factors TaWRKY49 and TaWRKY62 confer differential high-temperature seedling-plant resistance to Puccinia striiformis f. sp. tritici
Source: PubMed Central journal article supplement (PMC5526533; doi:10.1371/journal.pone.0181963), 2017-07-25
Supplement: pone.0181963.s004.pdf [file pone.0181963.s004.pdf]

A

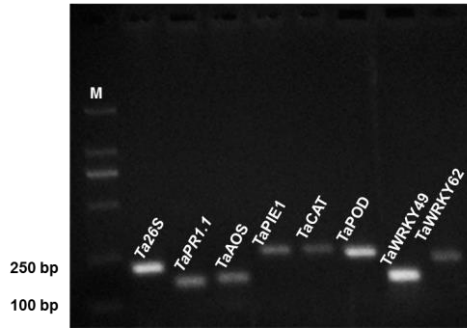

B

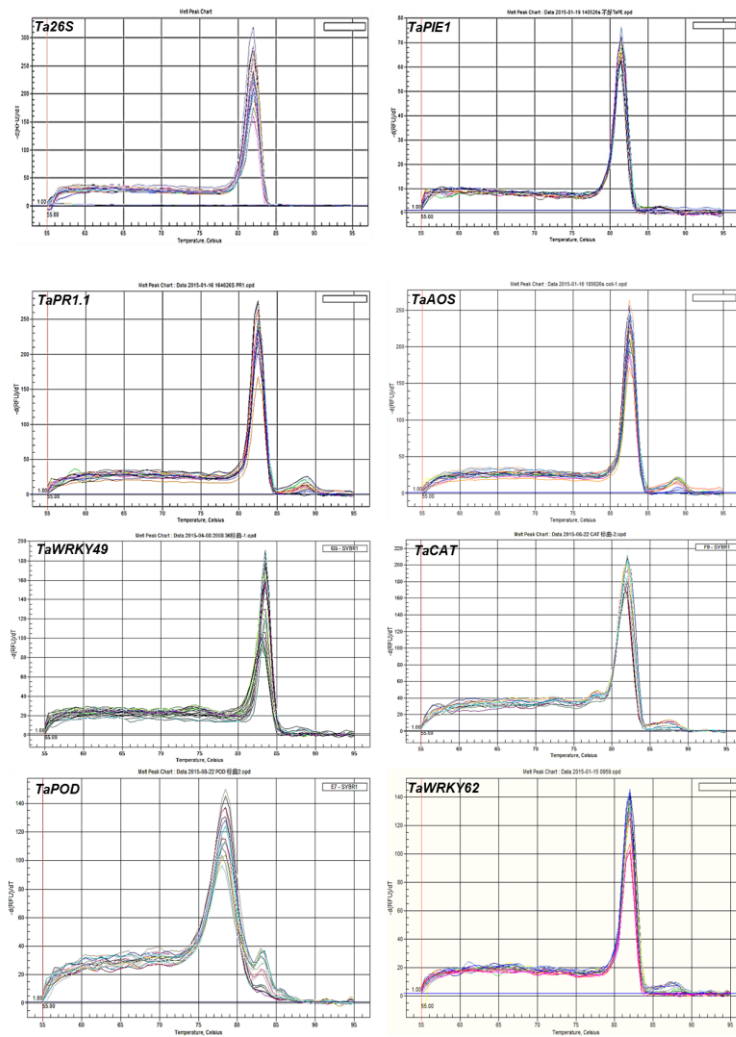

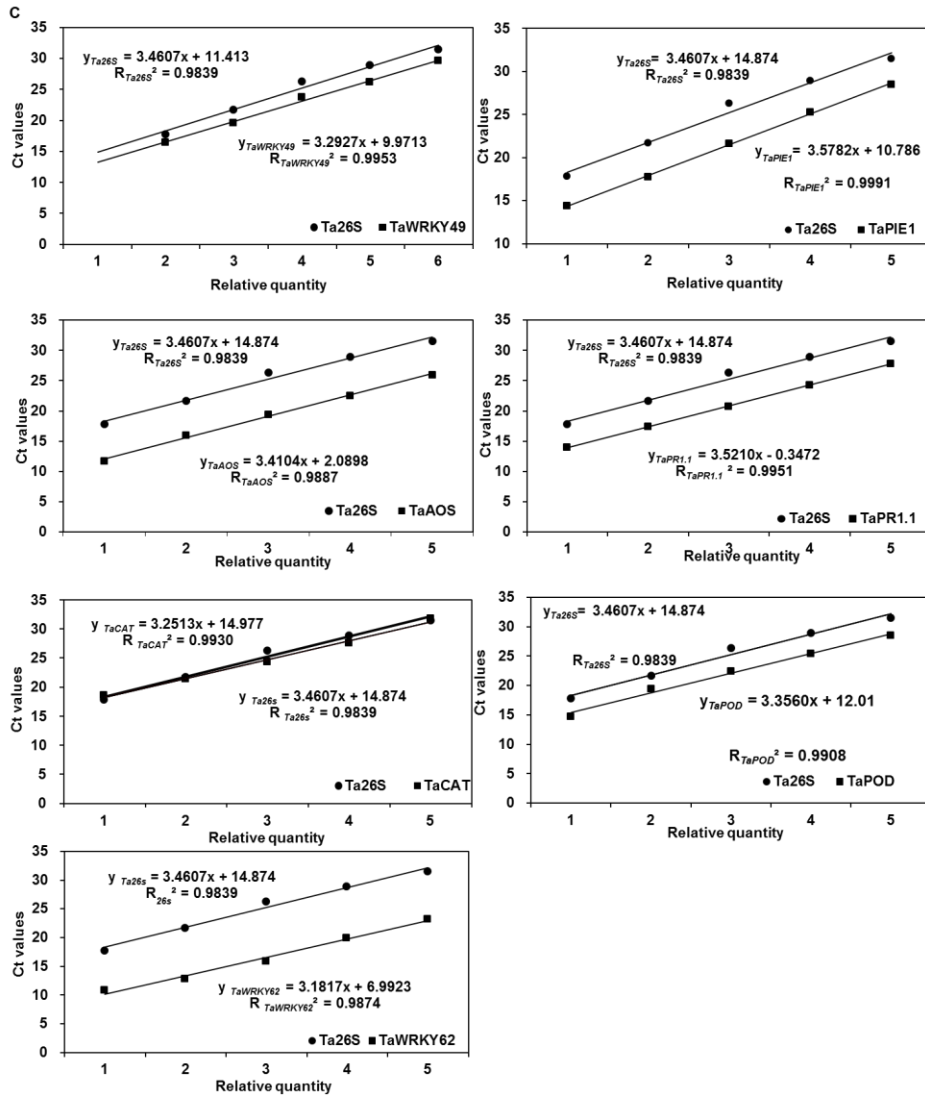

| Gene            | R <sup>2</sup> | Slope  | E      |
|-----------------|----------------|--------|--------|
| <i>TaWRKY49</i> | 0.9953         | 3.2927 | 101.2% |
| <i>TaPIE1</i>   | 0.9991         | 3.5782 | 90.3%  |
| <i>TaAOS</i>    | 0.9887         | 3.4104 | 96.4%  |
| <i>TaPR1.1</i>  | 0.9951         | 3.5210 | 92.3%  |
| <i>Ta26S</i>    | 0.9839         | 3.4607 | 94.5%  |
| <i>TaWRKY62</i> | 0.9874         | 3.1817 | 90.3%  |
| <i>TaCAT</i>    | 0.9930         | 3.2513 | 103.0% |
| <i>TaPOD</i>    | 0.9908         | 3.3560 | 98.6%  |

$$E = 10^{(1/\text{slope}) - 1}$$
