# Supplementary material for: The wheat WRKY transcription factors TaWRKY49 and TaWRKY62 confer differential high-temperature seedling-plant resistance to Puccinia striiformis f. sp. tritici
Source: PubMed Central journal article supplement (PMC5526533; doi:10.1371/journal.pone.0181963), 2017-07-25
Supplement: pone.0181963.s005.pdf [file pone.0181963.s005.pdf]

**A**

|                        |                      |         |              |       |                          |            |         |
|------------------------|----------------------|---------|--------------|-------|--------------------------|------------|---------|
| Hvpp                   | HVTKVRSCGGGKTPMDGYR  | WRKYGQK | FIKNNPHRSYYK | TSARC | SAKKHVEKSTDDPEMLIVTYEGS  | HLHGPPQ    | ----210 |
| HvWRKY36               | HVTKVRSCGGGKTPMDGYR  | WRKYGQK | FIKNNPHRSYYK | TSARC | SAKKHVEKSTDDPEMLIVTYEGS  | HLHGPPQ    | ----96  |
| TaWRKY49               | HTTKVRGCGGGK-TPMDGYR | WRKYGQK | FIKNNPHRSYYK | TSARC | SAKKHVEKSTDDPEMLIVTYEGS  | HLHGPPQ    | ----210 |
| TuWRKY49               | HTTKVRSCGGGK-TPMDGYR | WRKYGQK | FIKNNPHRSYYK | TSARC | SAKKHVEKSTDDPEMLIVTYEGS  | HLHGPPQ    | ----200 |
| OsI_04396              | YTSKVRSCGGKM-PADGYK  | WRKYGQK | SIKNNPHRSYYK | TSSRC | SAKKHVEKSTDDPEMLIVTYEGS  | HHGPPQLLPP | 209     |
| SbSORBIDRAFT_03g039550 | YTTKVRSCGGKT-PSDGYK  | WRKYGQK | SIKNNPHRSYYK | TSSRC | GAKKHVEKSTDDPEMLMVTYEGP  | HLHGPPQ    | ----222 |
| GhWRKY21               | YTLKVRSCGNGM-ADDGYK  | WRKYGQK | SIKNSPNRSYYK | TNPRC | NAKKQVEKSRDEADTLIIITYEGL | HLHFVDP    | ----174 |
| GhWRKY98               | YTLKVRSCGNGM-ADDGYK  | WRKYGQK | SIKNSPNRSYYK | TNPRC | NAKKQVEKSRDEADTLIIITYEGL | HLHFVDP    | ----174 |
| TcWRKY49               | YTLKIKCCGNGM-ADDGYK  | WRKYGQK | SIKNSPNRSYYK | TNPRC | SAKKQVERSRDDPDTLIIITYEGL | HLHFYP     | ----273 |
| PtPOPTR_0006s08730g    | YTLKLRKCGDM-ADDGYK   | WRKYGQK | SIKNSPHRSYYK | TNARC | SAKKQVERCEDPDTLIVTYEGL   | HLHYTP     | ----175 |

**B**

|              |                     |         |               |           |                                     |               |                         |                          |
|--------------|---------------------|---------|---------------|-----------|-------------------------------------|---------------|-------------------------|--------------------------|
| OsWRKY64     | ---DSVSLETPVPHYDGHQ | WRKYGQK | HINNSKHPRSYRC | TYRQEEK   | CKATKTVQQREDLHDHPVMYTVVYGG          | HTCCKGPVAS    | -ADDHVVEASQ-233         |                          |
| Os12g0116700 | DSVSLETPVPHYDGHQ    | WRKYGQK | HINNSKHPRYV   | IRHS      | -----                               | -----         | -----172                |                          |
| OsWRKY40     | -----HYDGHQ         | WRKYGQK | HINKSKHPRSYRC | TYRQEEK   | CKATKTVQQREDLHNGDHPIMYTVVYGG        | HTCCKGPAAL    | -ADDHVVEA- 232          |                          |
| TaWRKY62     | DSVALETPVPHYDGHQ    | WRKYGQK | INHTKHPRSYK   | TYKQDQC   | RATKTVQQQDAVGDDDPAMYTVVYGG          | HTCKPG        | ---QTDAAVVETA 163       |                          |
| OsWRKY       | --HTGSTVAQAPHNDGHQ  | WRKYGQK | WISRAKHSRSYRC | ANSKVQGC  | PATKTVQQDSSG                        | ---SKLFNVDYDQ | HTCRGDG---IADPYVVD- 183 |                          |
| OsJWRKY      | HTGSTVAQAPHNDGHQ    | WRKYGQK | WISRAKHSRSYRC | ANSKVQGC  | PATKTVQQDSSG                        | ---SKLFNVDYDQ | HTCRGDG---IANPYVVDTA137 |                          |
| TcWRKY70     | -----DDGHA          | WRKYGQK | VILNAKHPRNYRC | THKHDQCC  | QATKQVQI                            | IEDD          | ---PPKYGTYYGH           | HTCKNLKASQLILDS-TSK 204  |
| MeWRKY18     | -----               | WRKYGQK | VILNAKHPRNYRC | THKFDQCC  | QATKQVQRIEDE                        | ---PPMYRTYYGH | HTCKNLVKPCHFLDASDDA 221 |                          |
| MtWRKY       | -----               | WRKYGQK | KILHTDFPRNYRC | THKHDQCC  | KATKQVQI                            | QED           | ---PPLYKTTYAH           | HTCR-ILQSSEIIMDSPCDQ 210 |
| AetWRKY55    | ---RSLVTNVPHYDGHQ   | WRKYGQK | NINGRQHARSYRC | TYT-ERNCS | SATKTVQQDQDGGSSIYSADAGEDQGAKYTVVYGD | HTCKASDN      | -IS 270                 |                          |
